# Supplementary material for: Locating and quantifying CH 4 sources within a wastewater treatment plant based on mobile measurements
Source: Copernicus journal article supplement (doi:10.5194/egusphere-2024-2522), 2024-09-30
Supplement: Supplementary file 1 [file egusphere-2024-2522-supplement.pdf]

1     **Locating and quantifying CH<sub>4</sub> sources within a wastewater**  
2             **treatment plant based on mobile measurements**

3     Junyue Yang<sup>1</sup>, Zhengning Xu<sup>1</sup>, Zheng Xia<sup>4,5</sup>, Xiangyu Pei<sup>1</sup>, Yunye Yang<sup>1</sup>, Botian Qiu<sup>2,3</sup>, Shuang  
4     Zhao<sup>2,3</sup>, Yuzhong Zhang<sup>2,3\*</sup>, Zhibin Wang<sup>1,6\*</sup>

5     <sup>1</sup>Zhejiang Provincial Key Laboratory of Organic Pollution Process and Control, MOE Key  
6     Laboratory of Environment Remediation and Ecological Health, College of Environmental and  
7     Resource Sciences, Zhejiang University, Hangzhou 310058, China

8     <sup>2</sup>Key Laboratory of Coastal Environment and Resources of Zhejiang Province, School of  
9     Engineering, Westlake University, Hangzhou 310030, China

10    <sup>3</sup>Institute of Advanced Technology, Westlake Institute for Advanced Study, Hangzhou 310024,  
11    China

12    <sup>4</sup>Ecological and Environmental Monitoring Center of Zhejiang Province, Hangzhou 310012, China

13    <sup>5</sup>Zhejiang Key Laboratory of modern Ecological and Environmental Monitoring, Hangzhou 310012,  
14    China

15    <sup>6</sup>ZJU-Hangzhou Global Scientific and Technological Innovation Center, Zhejiang University,  
16    Hangzhou 311200, China

17

18    *Correspondence to:* Zhibin Wang ([wangzhibin@zju.edu.cn](mailto:wangzhibin@zju.edu.cn)) and Yuzhong Zhang  
19    ([zhangyuzhong@westlake.edu.cn](mailto:zhangyuzhong@westlake.edu.cn))

20

21 **Figures**

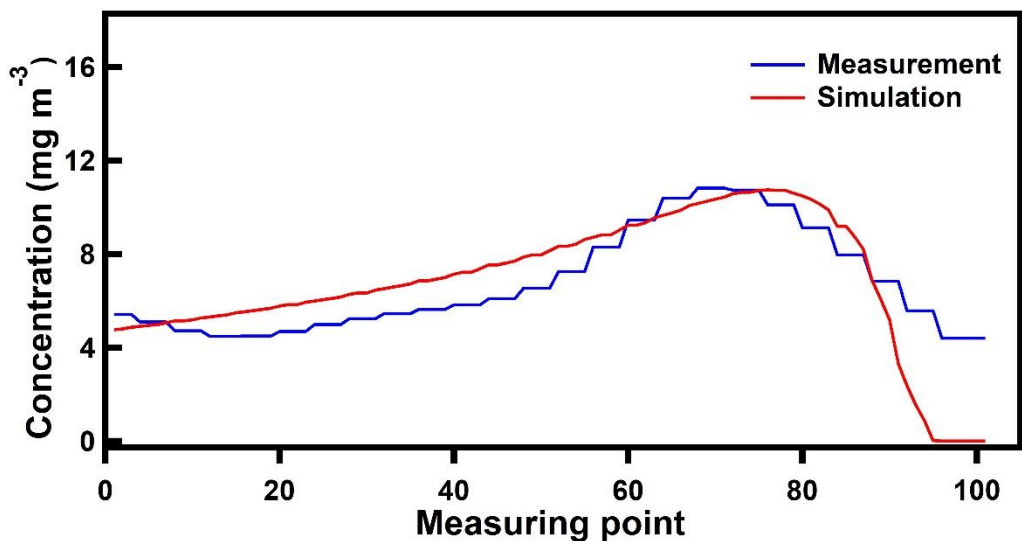

22

23 **Figure S1.** Comparison of CH<sub>4</sub> measurement and line source model simulation on a road between  
24 the Screen ① and the Primary Clarifier ①.

25

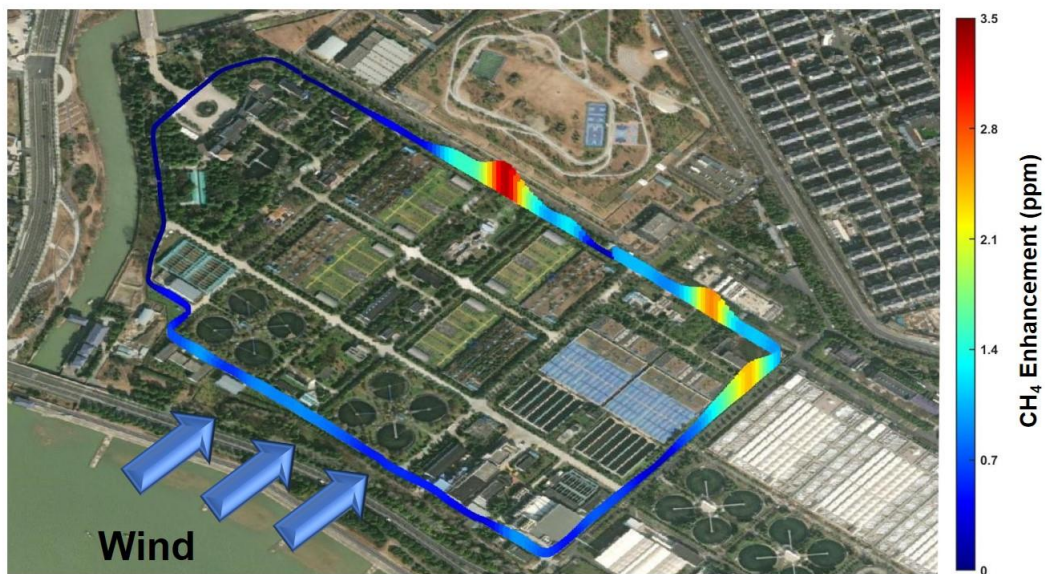

26

27 **Figure S2.** The CH<sub>4</sub> concentration map for the external roads of the WWTP on 1<sup>st</sup> June. Map data  
28 are from ESRI.

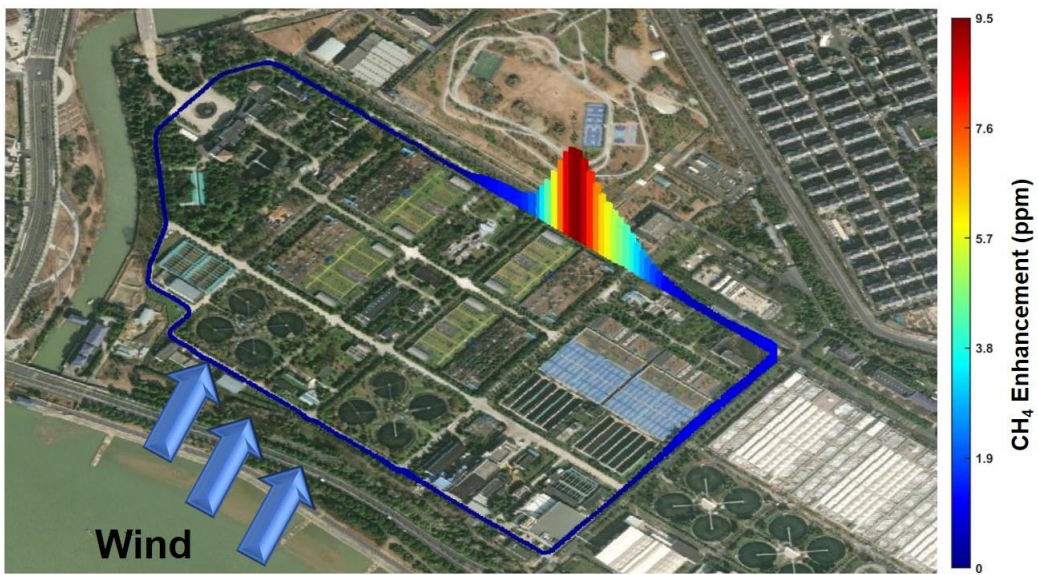

29

30 **Figure S3.** The CH<sub>4</sub> concentration map for the external roads of the WWTP on 11<sup>th</sup> July. Map data  
 31 are from ESRI.

32

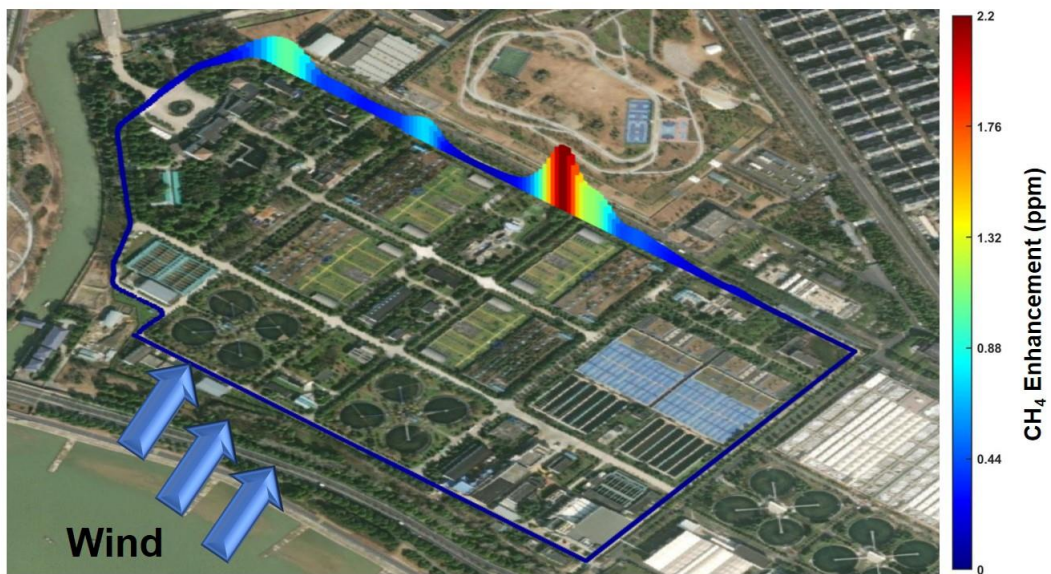

33

34 **Figure S4.** The CH<sub>4</sub> concentration map for the external roads of the WWTP on 14<sup>th</sup> December. Map  
 35 data are from ESRI.

36

37

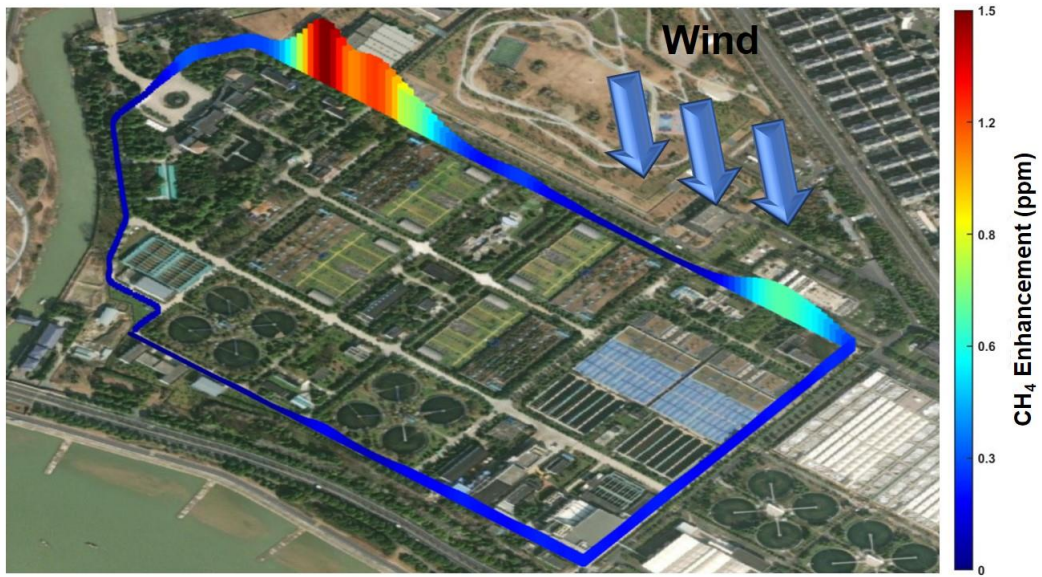

38  
 39 **Figure S5.** The CH<sub>4</sub> concentration map for the external roads of the WWTP on 20<sup>th</sup> December. Map  
 40 data are from ESRI.  
 41

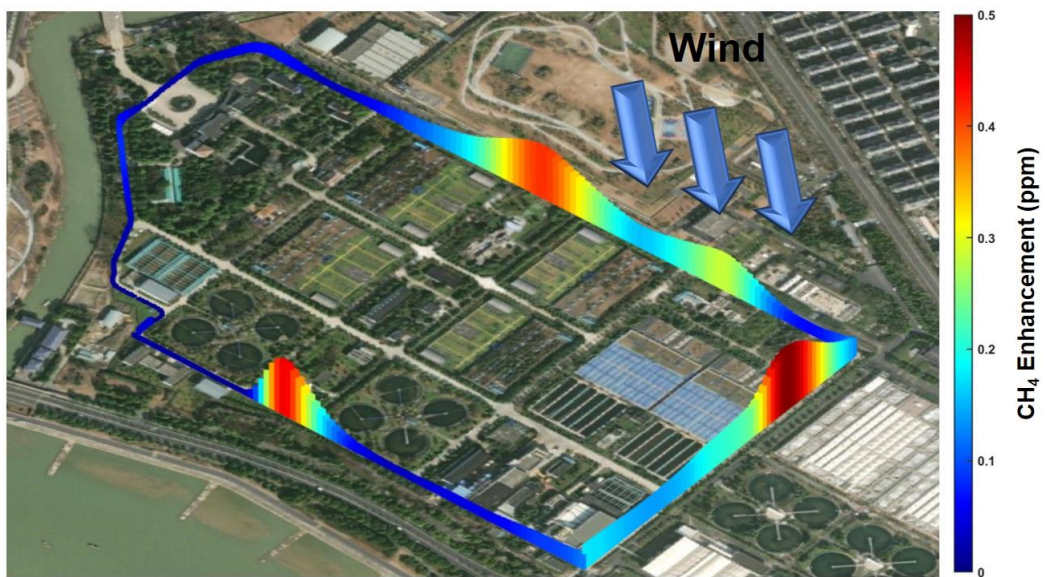

42  
 43 **Figure S6.** The CH<sub>4</sub> concentration map for the external roads of the WWTP on 21<sup>th</sup> December. Map  
 44 data are from ESRI.  
 45

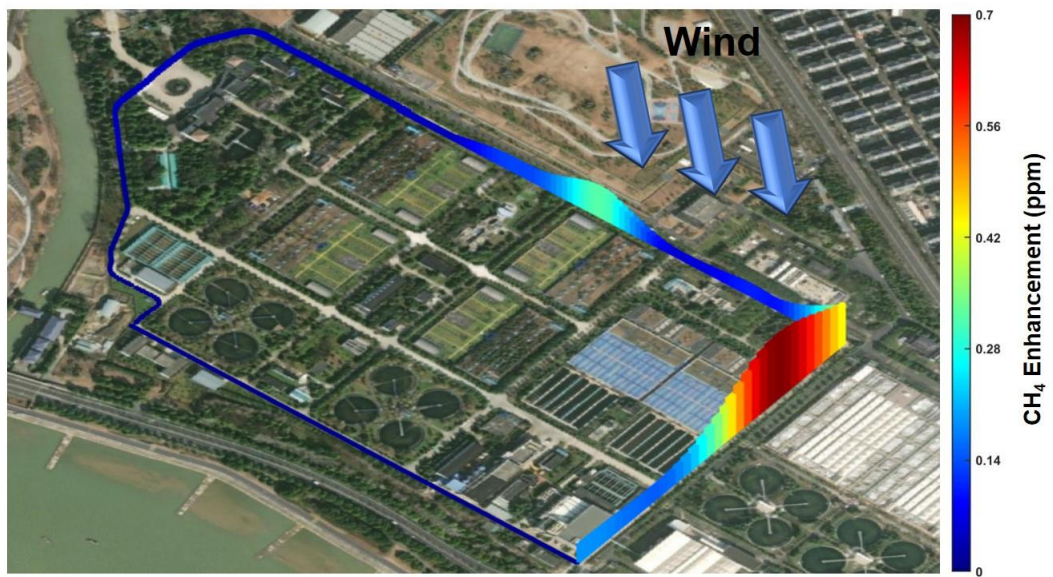

46

47 **Figure S7.** The CH<sub>4</sub> concentration map for the external roads of the WWTP on 22<sup>th</sup> December. Map

48 data are from ESRI.

49

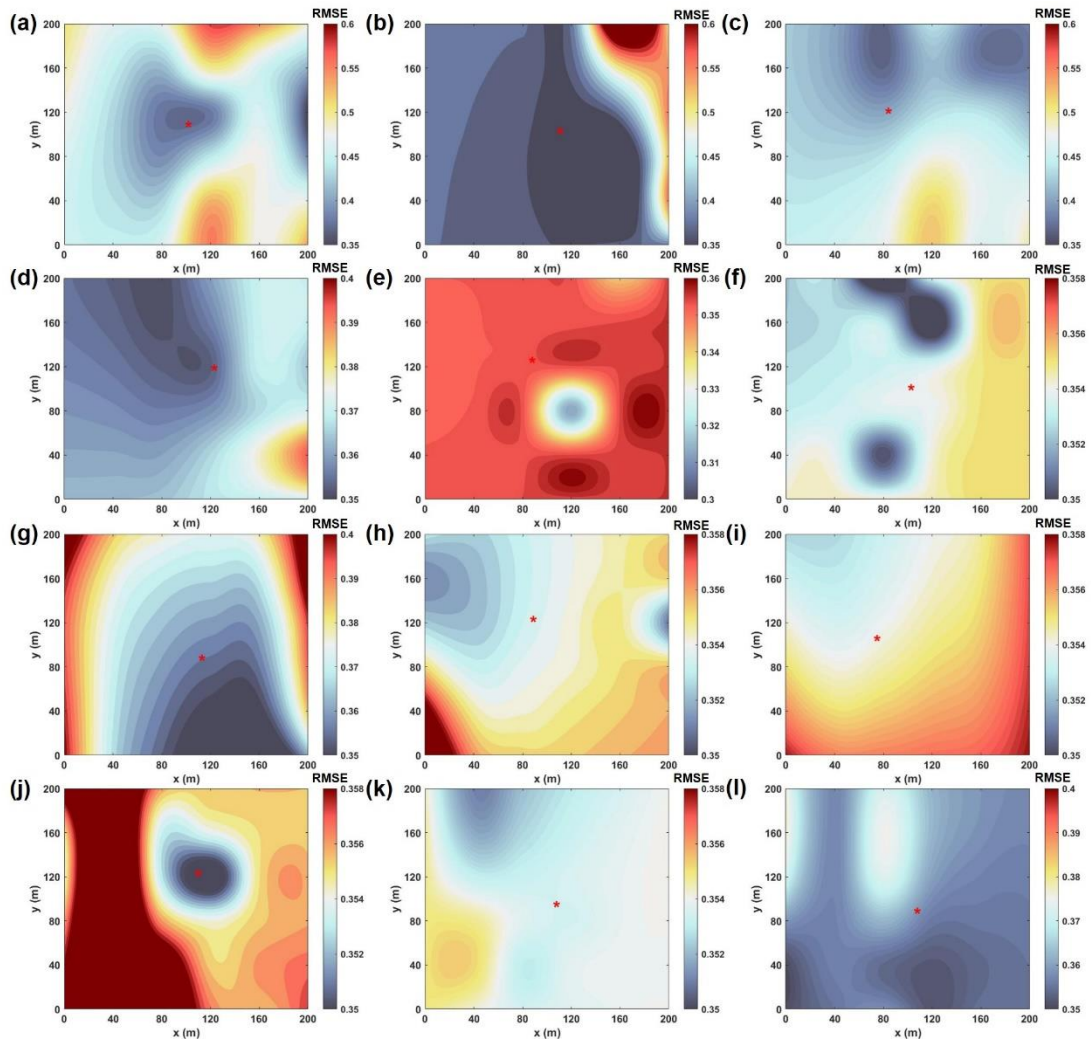

50

51 **Figure S8.** RMSE of monitoring simulated concentration changes with the location of WWTP

52 source on 1<sup>st</sup> June.

53

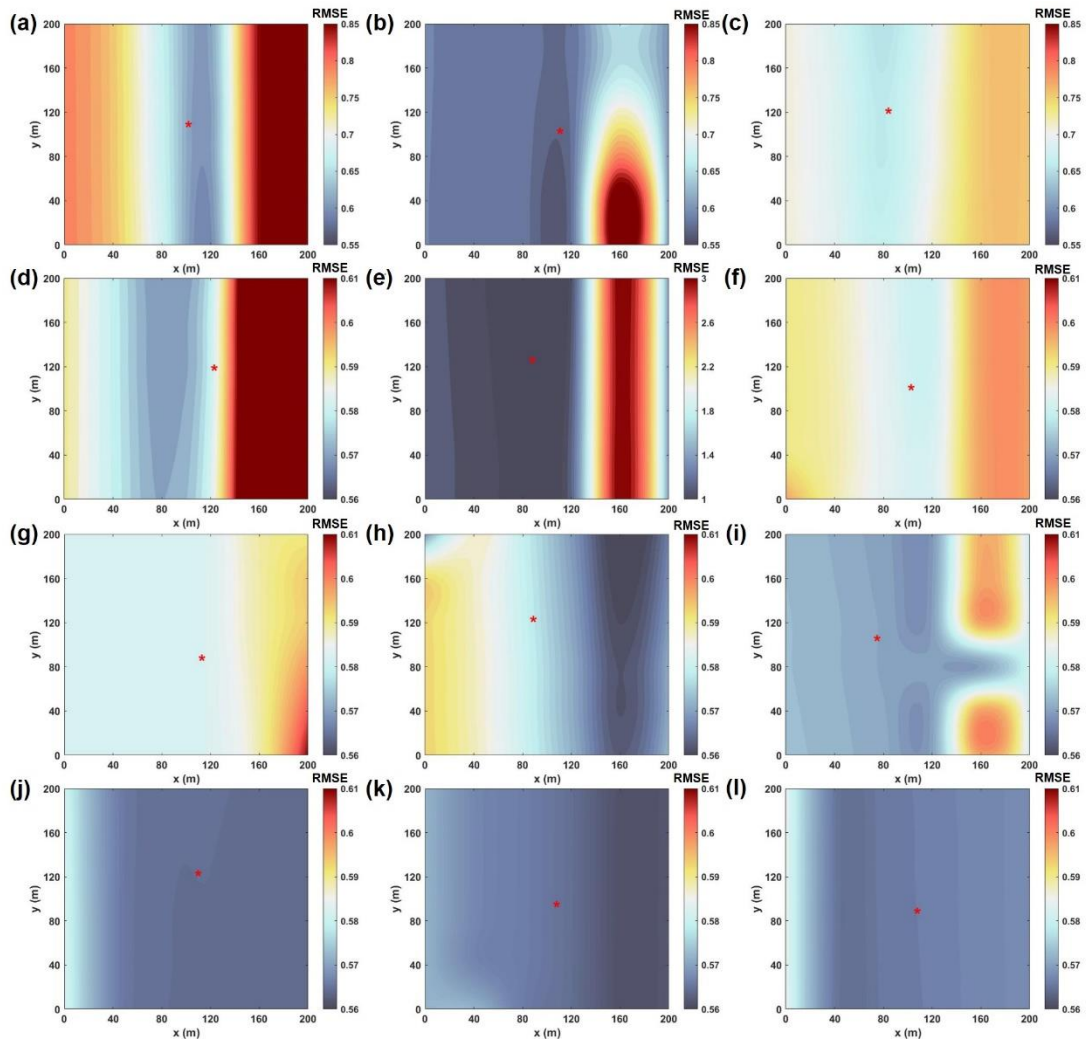

54

55 **Figure S9.** RMSE of monitoring simulated concentration changes with the location of WWTP

56 source on 11<sup>th</sup> July.

57

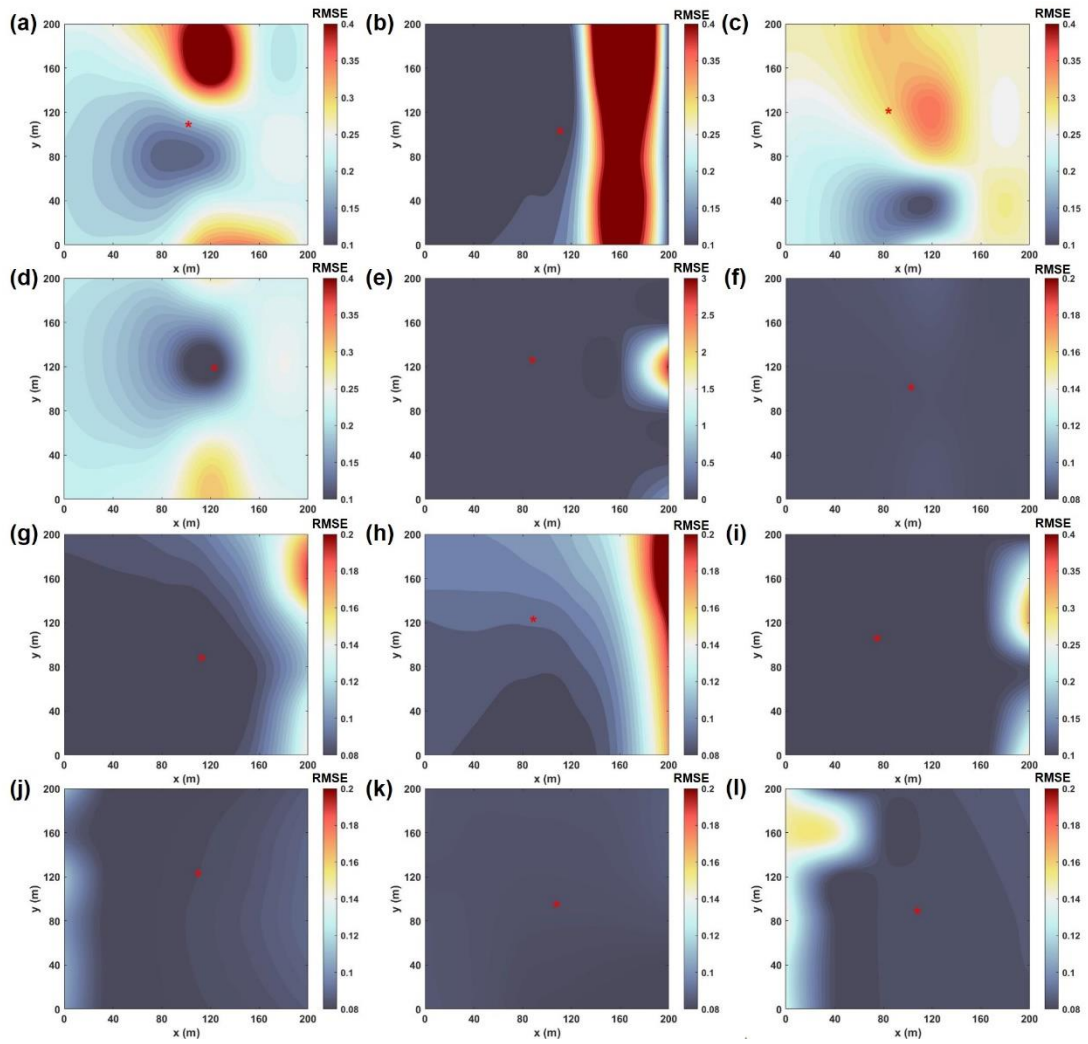

58

59 **Figure S10.** RMSE of monitoring simulated concentration changes with the location of WWTP

60 source on 14<sup>th</sup> December.

61



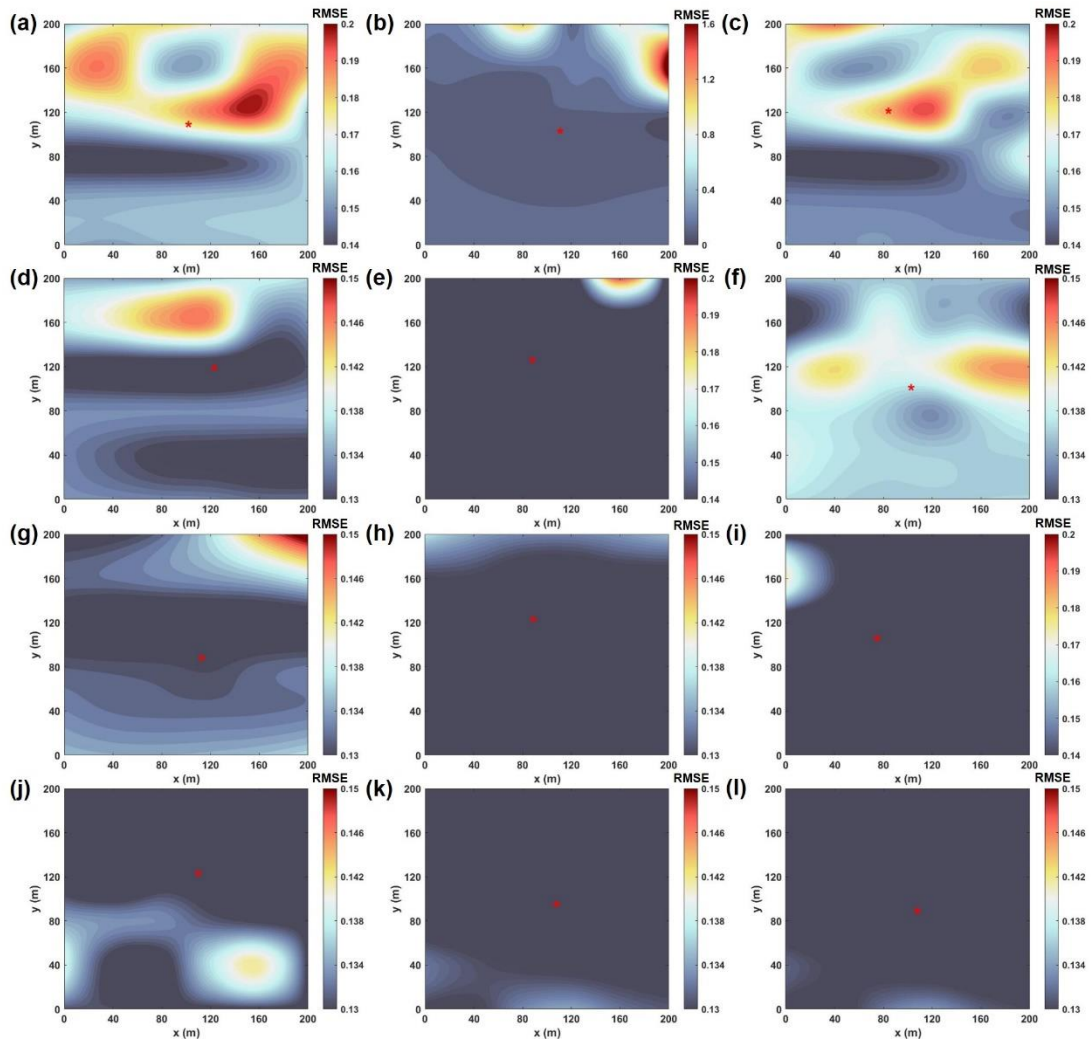

62

63 **Figure S11.** RMSE of monitoring simulated concentration changes with the location of WWTP

64 source on 20<sup>th</sup> December.

65

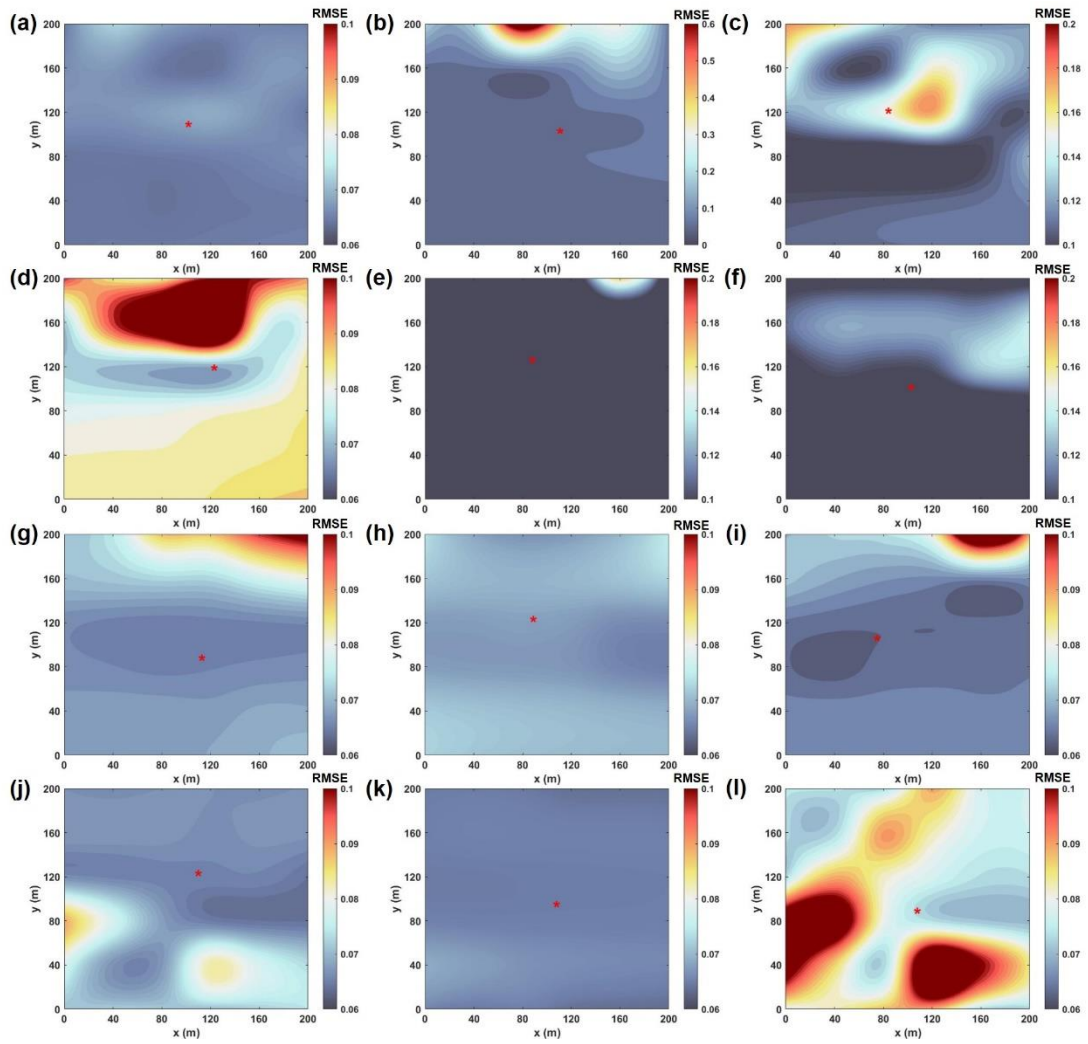

66

67 **Figure S12.** RMSE of monitoring simulated concentration changes with the location of WWTP

68 source on 21<sup>th</sup> December.

69

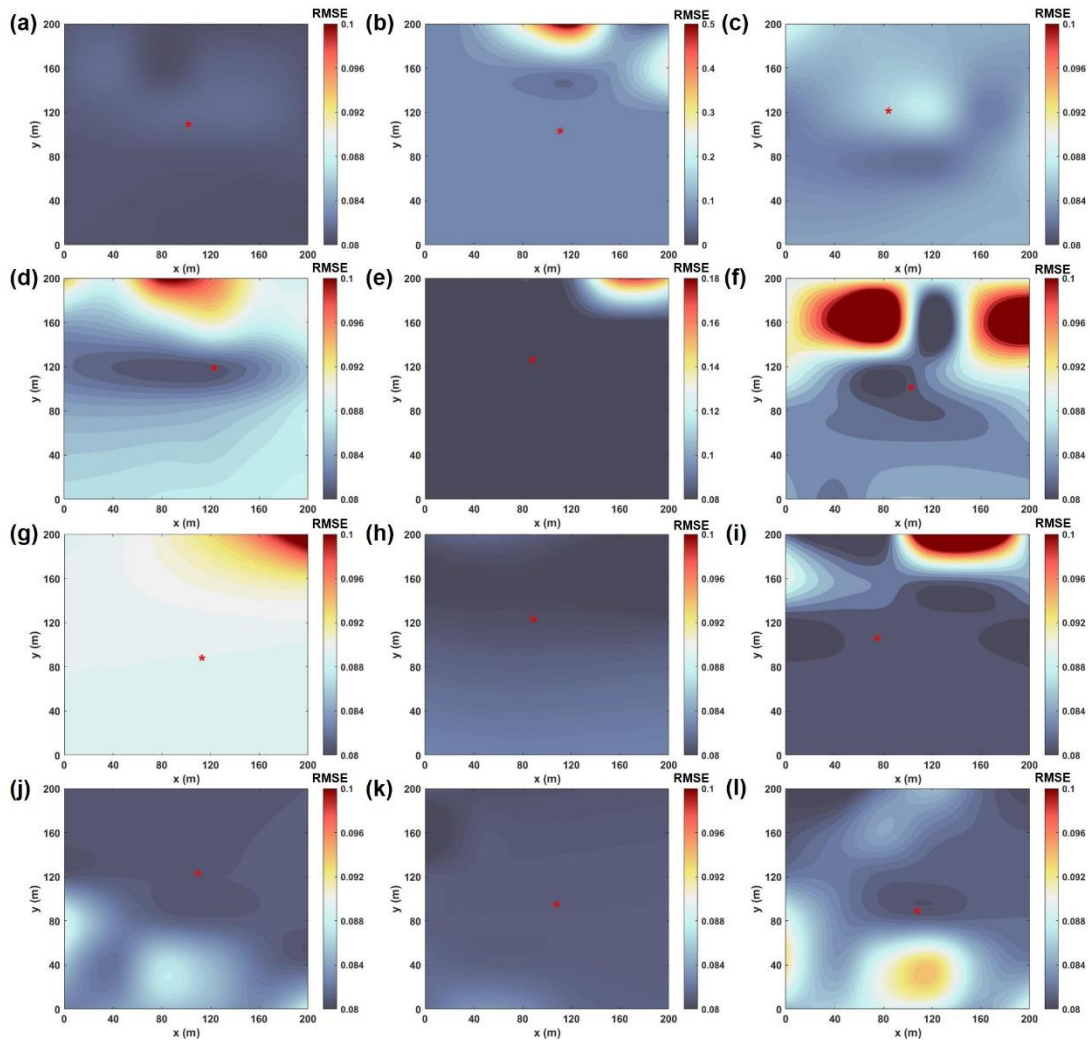

70

71 **Figure S13.** RMSE of monitoring simulated concentration changes with the location of WWTP

72 source on 22<sup>th</sup> December.

73

74

75

76 **Tables**

77 **Table S1.** CH<sub>4</sub> emission fluxes of experimental emission sources in summer measurements. Serial  
 78 number 1-12 corresponds to the types of point sources in Figure 3 (a) and 4(a) in the text, and serial  
 79 number 13 is the line source.

| Emission Sources              | Emission Fluxes (t a <sup>-1</sup> ) |        |        |
|-------------------------------|--------------------------------------|--------|--------|
|                               | 0601                                 | 0629   | 0711   |
| 1-Aeration Tank ③             | 66.21                                | 62.05  | 50.46  |
| 2-Primary Clarifier ③         | 17.93                                | 16.65  | 17.09  |
| 3-Screen ①                    | 39.03                                | 160.19 | 26.73  |
| 4-Primary Clarifier ④         | 26.03                                | 25.27  | 25.05  |
| 5-Aeration Tank ④             | 31.37                                | 69.68  | 184.08 |
| 6- Primary Clarifier ⑤        | 28.16                                | 12.31  | 12.61  |
| 7-Aeration Tank ②             | 37.64                                | 16.69  | 17.17  |
| 8-Aeration Tank ①             | 26.76                                | 25.40  | 26.83  |
| 9-Aeration Tank⑤              | 39.70                                | 32.29  | 18.16  |
| 10-Secondary Clarifier ①      | 13.63                                | 11.53  | 14.06  |
| 11-Secondary Clarifier ②      | 6.41                                 | 10.81  | 10.00  |
| 12- Sludge Treatment          | 17.16                                | 16.00  | 17.41  |
| 13-Screen①-Primary Clarifier① | 192.47                               | 198.31 | 190.66 |
| Total                         | 542.50                               | 657.18 | 610.31 |

80  
 81  
 82  
 83

84 **Table S2.** CH<sub>4</sub> emission fluxes of experimental emission sources in winter measurements.

| Emission Sources              | Emission Fluxes (t a <sup>-1</sup> ) |        |        |        |        |
|-------------------------------|--------------------------------------|--------|--------|--------|--------|
|                               | 1213                                 | 1214   | 1220   | 1221   | 1222   |
| 1-Aeration Tank ③             | 33.17                                | 30.99  | 37.96  | 15.74  | 7.56   |
| 2-Primary Clarifier ③         | 28.5                                 | 16.33  | 35.39  | 23.56  | 18.04  |
| 3-Screen ①                    | 31.29                                | 24.67  | 34.48  | 34.19  | 31.73  |
| 4-Primary Clarifier ④         | 26.56                                | 24.54  | 18.48  | 27.41  | 27.02  |
| 5-Aeration Tank ④             | 5.36                                 | 5.68   | 4.65   | 7.02   | 7.92   |
| 6- Primary Clarifier ⑤        | 21.33                                | 1.62   | 20.51  | 26.35  | 39.47  |
| 7-Aeration Tank ②             | 11.41                                | 13.97  | 27.51  | 27.15  | 26.45  |
| 8-Aeration Tank ①             | 24.32                                | 27.74  | 25.11  | 28.75  | 26.77  |
| 9-Aeration Tank⑤              | 34.48                                | 14.93  | 13.09  | 8.42   | 13.98  |
| 10-Secondary Clarifier ①      | 13.76                                | 11.52  | 12.98  | 14.35  | 17.43  |
| 11-Secondary Clarifier ②      | 7.264                                | 8.54   | 9.83   | 8.10   | 9.20   |
| 12-Sludge Treatment           | 18.56                                | 18.01  | 27.66  | 17.82  | 20.36  |
| 13-Screen①-Primary Clarifier① | 175.50                               | 181.23 | 170.90 | 183.67 | 176.47 |
| Total                         | 431.50                               | 379.77 | 438.55 | 422.53 | 422.40 |

85
